# Supplementary material for: G protein-coupled estrogen receptor regulates embryonic heart rate in zebrafish
Source: PLoS Genet. 2017 Oct 24;13(10):e1007069. doi: 10.1371/journal.pgen.1007069 (PMC5669493; doi:10.1371/journal.pgen.1007069)
Supplement: S1 Table — (XLSX) [file pgen.1007069.s008.xlsx]

## Sheet: data for Fig 1
experiment.date	genotype	clutch	treatment	dose	heart.rate.1	X2	X3	X4	X5	X6	X7	X8	X9	X10	X11	X12	X13	X14	X15	X16	X17	X18	X19	X20	X21	X22	X23	X24	mean.clutch	mean[treatment-vehicle]	percent change vs vehicle
6.20.13	wildtype	A	untreated		140	148	140	144	136	140	144	136	140	140	140	144	NA	NA	NA	NA	NA	NA	NA	NA	NA	NA	NA	NA	141
6.20.13	wildtype	A	vehicle	0.001	148	144	144	140	136	144	148	144	136	140	136	136	NA	NA	NA	NA	NA	NA	NA	NA	NA	NA	NA	NA	141.333	0
6.20.13	wildtype	A	estradiol	100ng/mL	180	144	168	164	168	168	152	152	152	164	160	152	NA	NA	NA	NA	NA	NA	NA	NA	NA	NA	NA	NA	160.333	19	0.134434
6.20.13	wildtype	A	ICI182,780	10μM	168	164	160	156	164	160	164	156	152	164	164	148	NA	NA	NA	NA	NA	NA	NA	NA	NA	NA	NA	NA	160	18.6667	0.132075
9.22.13	wildtype	B	untreated		136	140	140	136	144	136	140	136	136	144	NA	NA	NA	NA	NA	NA	NA	NA	NA	NA	NA	NA	NA	NA	138.8
9.22.13	wildtype	B	vehicle	0.001	144	144	140	144	140	140	136	140	140	140	NA	NA	NA	NA	NA	NA	NA	NA	NA	NA	NA	NA	NA	NA	140.8	0
9.22.13	wildtype	B	estradiol	100ng/mL	172	164	164	168	160	156	164	160	164	164	NA	NA	NA	NA	NA	NA	NA	NA	NA	NA	NA	NA	NA	NA	163.6	22.8	0.161932
9.22.13	wildtype	B	G36	1μM	136	136	144	144	148	136	148	152	156	148															144.8	4	0.0284091
9.22.13	wildtype	B	G1	1μM	200	204	188	192	200	196	184	188	196	184	NA	NA	NA	NA	NA	NA	NA	NA	NA	NA	NA	NA	NA	NA	193.2	52.4	0.372159
10.7.13	wildtype	C	vehicle	0.001	124	128	124	136	128	128	128	128	132	128	NA	NA	NA	NA	NA	NA	NA	NA	NA	NA	NA	NA	NA	NA	128.4
10.7.13	wildtype	C	G36	1μM	128	128	132	128	144	136	132	128	128	132															131.6	3.2	0.0249221
10.7.13	wildtype	C	G1	1μM	132	144	136	148	144	144	144	156	144	144	NA	NA	NA	NA	NA	NA	NA	NA	NA	NA	NA	NA	NA	NA	143.6	15.2	0.11838
4.24.14	wildtype	D	vehicle	0.001	116	128	116	100	112	124	96	96	116	112	NA	NA	NA	NA	NA	NA	NA	NA	NA	NA	NA	NA	NA	NA	111.6
4.24.14	wildtype	D	estradiol	100ng/uL	120	116	112	124	116	108	140	136	136	108	NA	NA	NA	NA	NA	NA	NA	NA	NA	NA	NA	NA	NA	NA	121.6	10	0.0896057
4.24.14	wildtype	D	ICI182,780	10μM	144	120	108	120	124	144	136	132	144	136	NA	NA	NA	NA	NA	NA	NA	NA	NA	NA	NA	NA	NA	NA	130.8	19.2	0.172043
4.30.14	wildtype	E	vehicle	0.001	128	136	128	128	128	124	128	124	128	124	124	136	140	136	136	136	NA	NA	NA	NA	NA	NA	NA	NA	130.25
4.30.14	wildtype	E	progesterone	1μM	136	140	132	144	132	136	124	136	124	124	NA	NA	NA	NA	NA	NA	NA	NA	NA	NA	NA	NA	NA	NA	132.8	2.55	0.0195777
5.1.14	wildtype	F	vehicle	0.001	128	136	128	128	128	124	128	124	124	136	140	136	136	136	NA	NA	NA	NA	NA	NA	NA	NA	NA	NA	130.857
5.1.14	wildtype	F	progesterone	1μM	156	140	132	144	132	136	124	136	124	124	124	136	136	124	NA	NA	NA	NA	NA	NA	NA	NA	NA	NA	133.429	2.57143	0.0196507
5.1.14	wildtype	F	estradiol	100ng/mL	156	152	152	148	136	144	140	140	136	136	124	140	140	NA	NA	NA	NA	NA	NA	NA	NA	NA	NA	NA	141.846	10.989	0.0839772
9.8.14	wildtype	H	vehicle	0.001	144	140	144	140	144	120	136	144	NA	NA	NA	NA	NA	NA	NA	NA	NA	NA	NA	NA	NA	NA	NA	NA	139
9.8.14	wildtype	H	ICI182,780	10μM	184	164	172	156	152	168	176	164	NA	NA	NA	NA	NA	NA	NA	NA	NA	NA	NA	NA	NA	NA	NA	NA	167	28	0.201439
9.8.14	wildtype	H	ICI182,780+G36	10μM+1μM	148	152	148	148	140	148	152	128	148	NA	NA	NA	NA	NA	NA	NA	NA	NA	NA	NA	NA	NA	NA	NA	145.778	6.77778	0.048761
9.8.14	wildtype	H	G36	1μM	144	144	148	140	136	140	144	140																	142	3	0.0215827
11.5.15	wildtype	Z	estradiol	100ng/mL	228	204	192	196	NA	NA	NA	NA	NA	NA	NA	NA	NA	NA	NA	NA	NA	NA	NA	NA	NA	NA	NA	NA	205	29	0.164773
11.5.15	wildtype	Z	vehicle	0.001	184	172	172	176	176	NA	NA	NA	NA	NA	NA	NA	NA	NA	NA	NA	NA	NA	NA	NA	NA	NA	NA	NA	176
11.5.15	wildtype	AA	estradiol	100ng/mL	196	200	192	NA	NA	NA	NA	NA	NA	NA	NA	NA	NA	NA	NA	NA	NA	NA	NA	NA	NA	NA	NA	NA	196	42.4	0.276042
11.5.15	wildtype	AA	vehicle	0.001	152	152	152	164	148	NA	NA	NA	NA	NA	NA	NA	NA	NA	NA	NA	NA	NA	NA	NA	NA	NA	NA	NA	153.6
11.18.15	wildtype	BB	vehicle	0.001	144	132	140	136	NA	NA	NA	NA	NA	NA	NA	NA	NA	NA	NA	NA	NA	NA	NA	NA	NA	NA	NA	NA	138
11.18.15	wildtype	BB	ICI182,780	10μM	152	152	152	156	NA	NA	NA	NA	NA	NA	NA	NA	NA	NA	NA	NA	NA	NA	NA	NA	NA	NA	NA	NA	153	15	0.108696
6.9.16	wildtype	II	vehicle	0.001	144	144	144	144	144	144	144	144	140	144	NA	NA	NA	NA	NA	NA	NA	NA	NA	NA	NA	NA	NA	NA	143.6
6.9.16	wildtype	II	estradiol	100ng/mL	180	184	176	168	172	180	180	180	176	172	NA	NA	NA	NA	NA	NA	NA	NA	NA	NA	NA	NA	NA	NA	176.8	33.2	0.231198
6.9.16	wildtype	II	progesterone	1μM	140	152	140	144	144	144	140	144	144	140	NA	NA	NA	NA	NA	NA	NA	NA	NA	NA	NA	NA	NA	NA	143.2	-0.4	-0.00278552
6.9.16	wildtype	II	vehicle	0.001	156	168	172	172	168	156	160	152	156	156	NA	NA	NA	NA	NA	NA	NA	NA	NA	NA	NA	NA	NA	NA	161.6
6.9.16	wildtype	II	ICI182,780	10μM	200	212	212	208	196	192	192	196	208	196	NA	NA	NA	NA	NA	NA	NA	NA	NA	NA	NA	NA	NA	NA	201.2	39.6	0.24505
6.9.16	wildtype	II	G36	1μM	160	172	172	156	172	168	176	172	168	168															168.4	6.8	0.0420792
6.9.16	wildtype	II	estradiol+G36	100ng/mL+1μM	200	200	196	192	208	204	216	208	204	200															202.8	41.2	0.25495
6.9.16	wildtype	II	G1	1μM	200	208	208	200	196	200	196	208	196	NA	NA	NA	NA	NA	NA	NA	NA	NA	NA	NA	NA	NA	NA	NA	201.333	39.7333	0.245875
6.9.16	wildtype	II	ICI182,780+G36	10μM+1μM	152	164	164	168	160	168	152	168	156	152	NA	NA	NA	NA	NA	NA	NA	NA	NA	NA	NA	NA	NA	NA	160.4	-1.2	-0.00742574
7.10.16	wildtype	OO	vehicle	0.001	120	124	120	132	120	NA	NA	NA	NA	NA	NA	NA	NA	NA	NA	NA	NA	NA	NA	NA	NA	NA	NA	NA	123.2
7.10.16	wildtype	OO	estradiol	100ng/mL	160	156	152	164	152	160	160	152	164	160	164	156	164	NA	NA	NA	NA	NA	NA	NA	NA	NA	NA	NA	158.769	35.5692	0.288711
7.12.16	wildtype	PP	vehicle	0.001	140	140	136	152	152	152	136	136	152	136	NA	NA	NA	NA	NA	NA	NA	NA	NA	NA	NA	NA	NA	NA	143.2
7.12.16	wildtype	PP	estradiol	100ng/mL	176	180	160	184	172	180	176	180	176	176	NA	NA	NA	NA	NA	NA	NA	NA	NA	NA	NA	NA	NA	NA	176	32.8	0.22905
7.12.16	wildtype	PP	estradiol+G36	100ng/mL+1μM	196	192	180	184	192	188	180	180	176	180															184.8	41.6	0.290503
7.12.16	wildtype	PP	G36	1μM	152	152	152	148	152	152	152	156	148	148															151.2	8	0.0558659
7.12.16	wildtype	PP	ICI182,780	10μM	172	160	176	176	180	176	172	176	176	NA	NA	NA	NA	NA	NA	NA	NA	NA	NA	NA	NA	NA	NA	NA	173.778	30.5778	0.213532
7.12.16	wildtype	PP	ICI182,780+G36	10μM+1μM	152	148	148	144	136	144	148	136	140	148	NA	NA	NA	NA	NA	NA	NA	NA	NA	NA	NA	NA	NA	NA	144.4	1.2	0.00837989
7.13.16	wildtype	QQ	vehicle	0.001	140	140	140	136	136	140	136	140	136	NA	NA	NA	NA	NA	NA	NA	NA	NA	NA	NA	NA	NA	NA	NA	138.222
7.13.16	wildtype	QQ	estradiol	100ng/mL	156	156	160	172	160	176	172	176	172	176	NA	NA	NA	NA	NA	NA	NA	NA	NA	NA	NA	NA	NA	NA	167.6	29.3778	0.21254
7.13.16	wildtype	QQ	estradiol+G36	100ng/mL+1μM	168	172	176	176	176	176	176	180	172	NA	NA	NA	NA	NA	NA	NA	NA	NA	NA	NA	NA	NA	NA	NA	174.667	36.4444	0.263666
2017-10-02	wildtype	RR	vehicle	0.002	140	148	144	144	136	136	132	128	136	144															138.8
2017-10-02	wildtype	RR	G1	1μM	156	160	196	196	164	148	160	152	136	152	148														160.727	21.9273	0.157977
2017-10-02	wildtype	RR	G1+G36	1μM+1μM	140	148	152	164	148	156	152	160	152																152.444	13.6444	0.0983029
2017-10-02	wildtype	SS	vehicle	0.002	148	168	152	152	148	168	156	164	152	160															156.8
2017-10-02	wildtype	SS	G1	1μM	176	176	180	168	160	168	180	176	180																173.778	16.9778	0.108277
2017-10-02	wildtype	SS	G1+G36	1μM+1μM	172	180	172	164	168	172	156	168	172	164															168.8	12	0.0765306
2017-10-02	wildtype	TT	vehicle	0.002	176	188	184	196	172	176	168	164	192	188															180.4
2017-10-02	wildtype	TT	G1	1μM	196	196	200	204	188	192	196	200	176	188															193.6	13.2	0.0731707
2017-10-02	wildtype	TT	G1+G36	1μM+1μM	188	192	192	180	188	180	196	184	188	188															187.6	7.2	0.0399113

## Sheet: data for Fig 2
experiment.date	gene	allele	genotype	clutch	treatment	dose	heart.rate.1	X2	X3	X4	X5	X6	X7	X8	X9	X10	X11	X12	X13	X14	X15	X16	X17	X18	X19	X20	X21	X22	X23	X24	transgenic.background	strain.background	Notes	mean.day	mean[treatment-vehicle]	percent change treatment vs vehicle
5.18.15	gper	uab102	MZ homozygote	K	vehicle	0.001	136	136	136	136	144	140	136	136	136	132	136	136	NA	NA	NA	NA	NA	NA	NA	NA	NA	NA	NA	NA	c262/c262	AB	NA	136.667
5.18.15	gper	uab102	MZ homozygote	K	estradiol	100ng/mL	136	132	116	124	132	124	128	132	132	128	140	NA	NA	NA	NA	NA	NA	NA	NA	NA	NA	NA	NA	NA	c262/c262	AB	NA	129.455	-7.21212	-0.0527716
5.28.15	gper	uab102	MZ homozygote	L	vehicle	0.001	160	156	168	168	160	156	164	152	160	172	NA	NA	NA	NA	NA	NA	NA	NA	NA	NA	NA	NA	NA	NA	c262/c262	AB	NA	161.6
5.28.15	gper	uab102	MZ homozygote	L	estradiol	100ng/mL	156	168	148	168	160	160	160	160	172	156	164	NA	NA	NA	NA	NA	NA	NA	NA	NA	NA	NA	NA	NA	c262/c262	AB	NA	161.091	-0.509091	-0.00315031
5.28.15	gper	uab102	MZ homozygote	L	ICI182,780	10 μM	124	140	128	148	152	148	152	148	156	NA	NA	NA	NA	NA	NA	NA	NA	NA	NA	NA	NA	NA	NA	NA	c262/c262	AB	NA	144	-17.6	-0.108911
6.12.15	gper	uab102	MZ homozygote	M	vehicle	0.001	136	136	136	136	144	144	148	144	NA	NA	NA	NA	NA	NA	NA	NA	NA	NA	NA	NA	NA	NA	NA	NA	c262/c262	AB	NA	140.5
6.12.15	gper	uab102	MZ homozygote	M	estradiol	100ng/mL	136	140	136	148	152	152	152	148	NA	NA	NA	NA	NA	NA	NA	NA	NA	NA	NA	NA	NA	NA	NA	NA	c262/c262	AB	NA	145.5	5	0.0355872
6.12.15	gper	uab102	MZ homozygote	M	ICI182,780	10 μM	140	136	160	148	144	140	148	NA	NA	NA	NA	NA	NA	NA	NA	NA	NA	NA	NA	NA	NA	NA	NA	NA	c262/c262	AB	NA	145.143	4.64286	0.0330452
6.22.15	gper	uab102	MZ homozygote	O	vehicle	0.001	132	128	124	132	132	124	128	128	132	128	NA	NA	NA	NA	NA	NA	NA	NA	NA	NA	NA	NA	NA	NA	c262/c262	AB	NA	128.8
6.22.15	gper	uab102	MZ homozygote	O	estradiol	100ng/mL	108	120	116	120	108	112	124	104	116	120	NA	NA	NA	NA	NA	NA	NA	NA	NA	NA	NA	NA	NA	NA	c262/c262	AB	NA	114.8	-14	-0.108696
6.22.15	gper	uab102	MZ homozygote	O	ICI182,780	10 μM	116	116	116	108	120	120	112	104	120	96	NA	NA	NA	NA	NA	NA	NA	NA	NA	NA	NA	NA	NA	NA	c262/c262	AB	NA	112.8	-16	-0.124224
6.23.16	gper	uab102	MZ homozygote	LL	vehicle	0.001	128	128	128	128	128	128	124	128	128	124	NA	NA	NA	NA	NA	NA	NA	NA	NA	NA	NA	NA	NA	NA	c262/c262	AB	NA	127.2
6.23.16	gper	uab102	MZ homozygote	LL	estradiol	100ng/mL	128	128	124	132	116	124	128	128	136	124	NA	NA	NA	NA	NA	NA	NA	NA	NA	NA	NA	NA	NA	NA	c262 mixed background	AB	NA	126.8	-0.4	-0.00314465
2017-06-29	gper	uab 102	MZ homozygote	XX	G1	1μM	148	144	148	144	140	136	144																					143.429	-0.571429	-0.00396825
2017-06-29	gper	uab 102	MZ homozygote	XX	vehicle	0.001	140	148	144	144	140	144	148																					144
2017-06-29	gper	uab 102	MZ homozygote	YY	G1	1μM	148	152	148	144	148	148	140																					146.857	-0.571429	-0.00387597
2017-06-29	gper	uab 102	MZ homozygote	YY	vehicle	0.001	148	148	148	148	148	144	148																					147.429
2017-06-29	gper	uab 102	MZ homozygote	ZZ	G1	1μM	156	152	148	148	144	144	148																					148.571	0	0
2017-06-29	gper	uab 102	MZ homozygote	ZZ	vehicle	0.001	156	148	148	144	144	148	152																					148.571
experiment.date	gene	allele	genotype	clutch	treatment	dose	heart.rate.1	X2	X3	X4	X5	X6	X7	X8	X9	X10	X11	X12	X13	X14	X15	X16	X17	X18	X19	X20	X21	X22	X23	X24	transgenic.background	strain.background	Notes	mean.day	mean[mutant-wt]	percent change mutant vs wt
4.8.15	gper	uab102	wildtype	I	untreated		152	148	144	148	148	152	156	160	156	152															c262/c262	AB		151.6
4.8.15	gper	uab102	MZ homozygote	I	untreated		132	128	120	116	128	124	120	124	120	128	120	128													c262/c262	AB		124	-27.6	-0.182058
5.8.15	gper	uab102	MZ homozygote	J	untreated		176	180	140	180	176	176	144	164	144	168	144	144	144												c262/c262	AB		160	-44.3333	-0.216966
5.8.15	AB		wildtype	J	untreated		216	208	188	204	192	188	208	192	200	224	228	204														AB		204.333
7.17.15	AB		wildtype	P	untreated		164	168	160	176	160	172	160	156	160	184	176	164														AB		166.667
7.17.15	gper	uab102	MZ homozygote	P	untreated		144	152	156	128	156	152	136	148	140	144	152														c262/c262	AB		146.182	-20.4848	-0.122909

## Sheet: data for Fig S1
experiment.date	gene	allele	genotype	clutch	treatment	dose	heart.rate.1	X2	X3	X4	X5	X6	X7	X8	X9	X10	X11	X12	X13	X14	X15	X16	X17	X18	X19	X20	X21	X22	X23	X24	mean.day	mean[treatment-vehicle]	percent change vs vehicle
12.11.15	gper	uab102	zyg homozygote	EE	vehicle	0.001	172	168	168	176	176	168	160	160	168	164	160	164	160	152	168	160	164	164	160	160	160	164	160	160	164
12.11.15	gper	uab102	zyg homozygote	EE	estradiol	100ng/mL	184	180	180	184	180	192	184	188	180	192	184	188	184	184	192	184	196	188	184	196	196	180	184	180	186	22	0.134146
7.10.16	gper	uab102	zyg homozygote	OO	vehicle	0.001	132	120	120	128	132	120	120	NA	NA	NA	NA	NA	NA	NA	NA	NA	NA	NA	NA	NA	NA	NA	NA	NA	124.571
7.10.16	gper	uab102	zyg homozygote	OO	estradiol	100ng/mL	160	156	156	156	164	152	152	160	NA	NA	NA	NA	NA	NA	NA	NA	NA	NA	NA	NA	NA	NA	NA	NA	157	32.4286	0.260321
7.18.16	gper	uab102	zyg homozygote	SS	vehicle	0.001	152	152	156	156	160	152	NA	NA	NA	NA	NA	NA	NA	NA	NA	NA	NA	NA	NA	NA	NA	NA	NA	NA	154.667
7.18.16	gper	uab102	zyg homozygote	SS	estradiol	100ng/mL	192	180	184	192	184	188	188	192	188	NA	NA	NA	NA	NA	NA	NA	NA	NA	NA	NA	NA	NA	NA	NA	187.556	32.8889	0.212644

## Sheet: data for Fig 3
experiment.date	gene	allele	genotype	clutch	treatment	dose	heart.rate.1	X2	X3	X4	X5	X6	X7	X8	X9	X10	X11	X12	X13	X14	X15	X16	X17	X18	X19	X20	X21	X22	X23	X24	mean.day	mean[treatment-vehicle]	percent change vs vehicle
11.5.15	esr1	uab118	zyg homozygote	AA	vehicle	0.001	152	152	152	148	148	144	140	NA	NA	NA	NA	NA	NA	NA	NA	NA	NA	NA	NA	NA	NA	NA	NA	NA	148
11.5.15	esr1	uab118	zyg homozygote	AA	estradiol	100ng/mL	180	180	176	172	176	180	NA	NA	NA	NA	NA	NA	NA	NA	NA	NA	NA	NA	NA	NA	NA	NA	NA	NA	177.333	29.3333	0.198198
6.21.16	esr1	uab118	MZ homozygote	KK	vehicle	0.001	136	136	136	132	136	132	136	136	136	136	NA	NA	NA	NA	NA	NA	NA	NA	NA	NA	NA	NA	NA	NA	135.2
6.21.16	esr1	uab118	MZ homozygote	KK	estradiol	100ng/mL	168	168	164	172	164	168	168	164	168	168	NA	NA	NA	NA	NA	NA	NA	NA	NA	NA	NA	NA	NA	NA	167.2	32	0.236686
2016-08-28	esr1	uab118	MZ homozygote	LL	vehicle	0.001	136	140	128	140	148	152	144	136	144	132	132	136													139
2016-08-28	esr1	uab118	MZ homozygote	LL	estradiol	100ng/mL	152	148	148	148	144	172	144	160	172	140															152.8	13.8	0.0992806
2017-07-01	esr1	uab118	zyg homozygote	CC	G1	1μM	192	192	192	188	192																				191.2	26.2	0.158788
2017-07-01	esr1	uab118	zyg homozygote	CC	vehicle	0.001	164	164	164	168																					165
2017-07-01	esr1	uab118	zyg homozygote	DD	G1	1μM	184	184	188	192	192	188	192																		188.571	20.9714	0.125128
2017-07-01	esr1	uab118	zyg homozygote	DD	vehicle	0.001	164	168	176	164	168	168	164	172	168	164															167.6
2017-07-01	esr1	uab118	zyg homozygote	EE	G1	1μM	188	192	188	192	188	192	184	188																	189	22.6	0.135817
2017-07-01	esr1	uab118	zyg homozygote	EE	vehicle	0.001	164	164	168	172	164																				166.4
12.15.15	esr2a	uab134	zyg homozygote	FF	vehicle	0.001	144	140	140	136	136	136																			138.667
12.15.15	esr2a	uab134	zyg homozygote	FF	estradiol	100ng/mL	168	176	172	184																					175	36.3333	0.262019
6.23.16	esr2a	uab134	zyg homozygote	MM	vehicle	0.001	148	156	152	144	164	144	152	144																	150.5
6.23.16	esr2a	uab134	zyg homozygote	MM	estradiol	100ng/mL	184	176	180	168	164	180	184	168	172	176	168	180	172	180	172										174.933	24.4333	0.162348
7.13.16	esr2a	uab134	zyg homozygote	RR	estradiol	100ng/mL	200	200	208	192	208	192	208	208	192	208															201.6	50.9333	0.338053
7.13.16	esr2a	uab134	zyg homozygote	RR	vehicle	0.001	156	152	144																						150.667
2017-06-29	esr2a	uab134	zyg homozygote	XX	vehicle	0.001	172	168	176	172																					172
2017-06-29	esr2a	uab134	zyg homozygote	XX	G1	1μM	188	196	188	188	188	192																			190	18	0.104651
2017-06-29	esr2a	uab134	zyg homozygote	YY	vehicle	0.001	168	168	172	168	168	172	168																		169.143
2017-06-29	esr2a	uab134	zyg homozygote	YY	G1	1μM	208	204	220	216	220	208	216	216	220																214.222	45.0794	0.266517
2017-06-29	esr2a	uab134	zyg homozygote	ZZ	vehicle	0.001	176	176	176	180																					177
2017-06-29	esr2a	uab134	zyg homozygote	ZZ	G1	1μM	204	212	204	220	204																				208.8	31.8	0.179661
12.17.15	esr2b	uab127	zyg homozygote	GG	estradiol	100ng/mL	168	160	168	172	172	172	160	168	176	172	172														169.091	35.6364	0.26703
12.17.15	esr2b	uab127	zyg homozygote	GG	vehicle	0.001	136	140	140	132	140	136	128	128	136	132	120														133.455
12.23.15	esr2b	uab127	zyg homozygote	HH	estradiol	100ng/mL	176	180	176	160	168	168	156	152	164	168	172	160	180												167.692	32.8034	0.243188
12.23.15	esr2b	uab127	zyg homozygote	HH	vehicle	0.001	136	136	136	136	136	136	136	136	136	136	136	136	132	132	136	132	132	132							134.889
6.24.16	esr2b	uab127	zyg homozygote	NN	vehicle	0.001	144	144	144	144	144	144	148	144																	144.5
6.24.16	esr2b	uab127	zyg homozygote	NN	estradiol	100ng/mL	172	168	160	184	168	184	176	176																	173.5	29	0.200692
2017-06-29	esr2b	uab127	zyg homozygote	A1	G1	1μM	228	220	224	224	224	220	228	232	228	224	220	228													225	57	0.339286
2017-06-29	esr2b	uab127	zyg homozygote	A1	vehicle	0.001	164	168	172																						168
2017-07-10	esr2b	uab127	zyg homozygote	B1	G1	1μM	176	176	176	176																					176	20	0.128205
2017-07-10	esr2b	uab127	zyg homozygote	B1	vehicle	0.001	168	160	152	152	152	156	152																		156
2017-07-10	esr2b	uab127	zyg homozygote	C1	G1	1μM	200	200	212	212	216	212	212																		209.143	38.1429	0.223058
2017-07-10	esr2b	uab127	zyg homozygote	C1	vehicle	0.001	172	168	172	172																					171
experiment.date	gene	allele	genotype	clutch	treatment	dose	heart.rate.1	X2	X3	X4	X5	X6	X7	X8	X9	X10	X11	X12	X13	X14	X15	X16	X17	X18	X19	X20	X21	X22	X23	X24	mean.day	mean[mutant-wt]	percent change mutant vs wt
11.5.15	esr1	uab118	het	AA	vehicle	0.001	152	148	144	148	156	148	160	160	160	144	160	156	NA	NA	NA	NA	NA	NA	NA	NA	NA	NA	NA	NA	153	-0.6	-0.00390625
11.5.15	esr1	uab118	zyg homozygote	AA	vehicle	0.001	152	152	152	148	148	144	140	NA	NA	NA	NA	NA	NA	NA	NA	NA	NA	NA	NA	NA	NA	NA	NA	NA	148	-5.6	-0.0364583
11.5.15	esr1	uab118	wildtype	AA	vehicle	0.001	152	152	152	164	148	NA	NA	NA	NA	NA	NA	NA	NA	NA	NA	NA	NA	NA	NA	NA	NA	NA	NA	NA	153.6
11.18.15	esr1	uab118	het	BB	vehicle	0.001	140	140	136	128	132	128	128	140	136	128	132	132	136	132	NA	NA	NA	NA	NA	NA	NA	NA	NA	NA	133.429	-4.57143	-0.0331263
11.18.15	esr1	uab118	zyg homozygote	BB	vehicle	0.001	136	128	132	140	136	140	NA	NA	NA	NA	NA	NA	NA	NA	NA	NA	NA	NA	NA	NA	NA	NA	NA	NA	135.333	-2.66667	-0.0193237
11.18.15	esr1	uab118	wildtype	BB	vehicle	0.001	144	132	140	136	NA	NA	NA	NA	NA	NA	NA	NA	NA	NA	NA	NA	NA	NA	NA	NA	NA	NA	NA	NA	138
10.30.15	esr1	uab118	het	W	untreated		160	160	168	164	164	160	156	168	160	172	176	152	156	156	172	184	192	188	188	NA	NA	NA	NA	NA	168.211	-2.98947	-0.0174619
10.30.15	esr1	uab118	zyg homozygote	W	untreated		160	164	160	164	164	164	164	172	164	144	176	168	NA	NA	NA	NA	NA	NA	NA	NA	NA	NA	NA	NA	163.667	-7.53333	-0.0440031
10.30.15	esr1	uab118	wildtype	W	untreated		168	168	164	176	180	NA	NA	NA	NA	NA	NA	NA	NA	NA	NA	NA	NA	NA	NA	NA	NA	NA	NA	NA	171.2
10.30.15	esr1	uab119	het	X	untreated		168	176	172	172	188	172	176	172	172	156	184	184	188	184	184	176	176	172	192	184	164	184	168	NA	176.696	-5.1867	-0.0285168
10.30.15	esr1	uab119	zyg homozygote	X	untreated		172	168	176	180	184	176	176	188	188	196	192	168	NA	NA	NA	NA	NA	NA	NA	NA	NA	NA	NA	NA	180.333	-1.54902	-0.0085166
10.30.15	esr1	uab119	wildtype	X	untreated		176	180	180	168	172	188	204	176	176	184	188	176	196	180	180	188	180	NA	NA	NA	NA	NA	NA	NA	181.882
8.28.15	esr2a	uab134	het	R	untreated		148	148	148	144	140	144	144	156	144	148	NA	NA	NA	NA	NA	NA	NA	NA	NA	NA	NA	NA	NA	NA	146.4	-2.6	-0.0174497
8.28.15	esr2a	uab134	zyg homozygote	R	untreated		156	144	152	144	144	140	144	156	136	156	NA	NA	NA	NA	NA	NA	NA	NA	NA	NA	NA	NA	NA	NA	147.2	-1.8	-0.0120805
8.28.15	esr2a	uab134	wildtype	R	untreated		152	140	156	148	NA	NA	NA	NA	NA	NA	NA	NA	NA	NA	NA	NA	NA	NA	NA	NA	NA	NA	NA	NA	149
10.29.15	esr2a	uab134	het	V	untreated		168	164	164	172	180	164	168	168	156	172	176	180	180	196	180	NA	NA	NA	NA	NA	NA	NA	NA	NA	172.533	2.13333	0.0125196
10.29.15	esr2a	uab134	zyg homozygote	V	untreated		180	172	176	180	NA	NA	NA	NA	NA	NA	NA	NA	NA	NA	NA	NA	NA	NA	NA	NA	NA	NA	NA	NA	177	6.6	0.0387324
10.29.15	esr2a	uab134	wildtype	V	untreated		172	168	164	180	168	NA	NA	NA	NA	NA	NA	NA	NA	NA	NA	NA	NA	NA	NA	NA	NA	NA	NA	NA	170.4
11.19.15	esr2a	uab134	het	CC	untreated		144	144	156	140	148	148	144	132	140	128	136	128	144	144	140	NA	NA	NA	NA	NA	NA	NA	NA	NA	141.067	-2.26667	-0.015814
11.19.15	esr2a	uab134	zyg homozygote	CC	untreated		140	128	136	128	136	144	148	NA	NA	NA	NA	NA	NA	NA	NA	NA	NA	NA	NA	NA	NA	NA	NA	NA	137.143	-6.19048	-0.0431894
11.19.15	esr2a	uab134	wildtype	CC	untreated		144	144	148	136	160	128	NA	NA	NA	NA	NA	NA	NA	NA	NA	NA	NA	NA	NA	NA	NA	NA	NA	NA	143.333
6.19.16	esr2b	uab127	het	JJ	untreated		144	136	132	128	140	136	144	132	132	132	128	136	136	144	140	144	NA	NA	NA	NA	NA	NA	NA	NA	136.5	-3.9	-0.0277778
6.19.16	esr2b	uab127	zyg homozygote	JJ	untreated		136	132	128	128	152	148	132	148	NA	NA	NA	NA	NA	NA	NA	NA	NA	NA	NA	NA	NA	NA	NA	NA	138	-2.4	-0.017094
6.19.16	esr2b	uab127	wildtype	JJ	untreated		136	140	140	160	144	136	132	128	144	144	NA	NA	NA	NA	NA	NA	NA	NA	NA	NA	NA	NA	NA	NA	140.4
2016-06-20	esr2b	uab127	het		untreated		190	190	180	180	180	180	180	180	190	190	195	200	200	195	195	195									188.75	0.892857	0.00475285
2016-06-20	esr2b	uab127	zyg homozygote		untreated		180	195	185	170	200	195	195	195	195	195	195	195	190												191.154	3.2967	0.017549
2016-06-20	esr2b	uab127	wildtype		untreated		175	185	180	190	195	195	195																		187.857
2015-10-12	esr2b	uab127	het		untreated		144	144	144	132	132	128	128	128																	135	1	0.00746269
2015-10-12	esr2b	uab127	zyg homozygote		untreated		136	132	136	136																					135	1	0.00746269
2015-10-12	esr2b	uab127	wildtype		untreated		144	128	132	132																					134

## Sheet: data for Fig S5
experiment date	gene	allele	genotype	clutch	treatment (vehicle = DMSO)	dose	hpf at exposure start	exposure duration (h)	heart rate (bpm) embryo 1	2	3	4	5	6	7	8	9	10	11	12	13	14	15	16	17	18	19	20	21	22	23	24	n embryos	mean.clutch	mean[treatment-vehicle]	percent change vs vehicle
2017-08-07	esr2a	uab 134	MZesr2a-/-	A	E2	100ng/mL	49	1	132	132	136	132	132	132	128	136	132																9	132.444	10.6667	0.0875912
2017-08-07	esr2a	uab 134	MZesr2a-/-	A	G1	1μM	49	1	140	136	156	144	140	140	132	128	136	124															10	137.6	15.8222	0.129927
2017-08-07	esr2a	uab 134	MZesr2a-/-	A	vehicle	0.001	49	1	128	124	116	128	124	120	120	120	116																9	121.778
2017-08-07	esr1	uab 118	MZesr1-/-	B	G1	1μM	49	1	172	164	156	152	144	148	148	152	152	152	148														11	153.455	9.45455	0.0656566
2017-08-07	esr1	uab 118	MZesr1-/-	B	vehicle	0.001	49	1	136	144	152	140	140	144	152	136	152	144															10	144
2017-08-07	esr1	uab 118	MZesr1-/-	C	E2	100ng/mL	49	1	172	168	164	172	160	160	168	160	160	164	152	168	176												13	164.923	10.2564	0.066313
2017-08-07	esr1	uab 118	MZesr1-/-	C	G1	1μM	49	1	172	168	152	164	156	164	164	160	176	168	176	164	160												13	164.923	10.2564	0.066313
2017-08-07	esr1	uab 118	MZesr1-/-	C	vehicle	0.001	49	1	164	168	156	164	140	152	148	140	152	152	164	156													12	154.667
2017-08-10	esr2a	uab 134	MZesr2a-/-	D	E2	100ng/mL	49	1	152	156	152	148	160	152	144	144	144	148															10	150	12.8	0.0932945
2017-08-10	esr2a	uab 134	MZesr2a-/-	D	G1	1μM	49	1	152	164	160	116	132	148	160	164	152																9	149.778	12.5778	0.0916748
2017-08-10	esr2a	uab 134	MZesr2a-/-	D	vehicle	0.001	49	1	140	132	140	148	144	136	144	120	140	128															10	137.2
6.21.16	esr1	uab118	MZesr1	KK	vehicle	0.001	49	1	136	136	136	132	136	132	136	136	136	136	NA	NA	NA	NA	NA	NA	NA	NA	NA	NA	NA	NA	NA	NA	8	135.2
6.21.16	esr1	uab118	MZesr1	KK	E2	100ng/mL	49	1	168	168	164	172	164	168	168	164	168	168	NA	NA	NA	NA	NA	NA	NA	NA	NA	NA	NA	NA	NA	NA	8	167.2	32	0.236686
2016-08-28	esr1	uab118	MZesr1	LL	vehicle	0.001	49	1	136	140	128	140	148	152	144	136	144	132	132	136													10	139
2016-08-28	esr1	uab118	MZesr1	LL	E2	100ng/mL	49	1	152	148	148	148	144	172	144	160	172	140															8	152.8	13.8	0.0992806

## Sheet: data for Fig 5
experiment.date	gene	allele	genotype	clutch	treatment	dose	heart.rate.1	X2	X3	X4	X5	X6	X7	X8	X9	X10	X11	X12	X13	X14	X15	X16	X17	X18	X19	X20	X21	X22	X23	X24	n embryos	Notes	mean.day	mean[T3-vehicle]	percent change vs vehicle
2017-04-13			wildtype	A	Vehicle (methanol)	0.1% methanol	172	172	168	164	172	168	168	164	168	172															10		168.8
2017-04-13			wildtype	A	T3	5nM	192	184	188	188	196	196	196	192																	8		191.5	22.7	0.134479
2017-04-13	gper	uab102	MZ homozygote	B	Vehicle (methanol)	0.1% methanol	144	144	140	152	140	136	136	140	136	136	140														11		140.364
2017-04-13	gper	uab102	MZ homozygote	B	T3	5nM	164	164	156	160	164	152	160	160	164	160															10		160.4	20.0364	0.142746
2017-04-19			wildtype	C	Vehicle (methanol)	0.1% methanol	160	156	160	164	164	168	160	156	168																9		161.778
2017-04-19			wildtype	C	T3	5nM	192	184	192	192	192	184	200	192	188																9		190.667	28.8889	0.178571
2017-04-19	gper	uab102	MZ homozygote	D	Vehicle (methanol)	0.1% methanol	132	136	140	124	132	132	128	132	128																9		131.556
2017-04-19	gper	uab102	MZ homozygote	D	T3	5nM	140	148	144	148	152	160	152	152	144																9		148.889	17.3333	0.131757
2017-04-19			wildtype	E	Vehicle (methanol)	0.1% methanol	196	212	216	212	216	216	212	208																	8		211
2017-04-19			wildtype	E	T3	5nM	236	224	220	232	228	228																			6		228	17	0.0805687
2017-04-19	gper	uab102	MZ homozygote	F	Vehicle (methanol)	0.1% methanol	148	152	148	152	156	148	160	168																	8		154
2017-04-19	gper	uab102	MZ homozygote	F	T3	5nM	180	192	192	192	184	184	188																		7		187.429	33.4286	0.217069
experiment date	gene	allele	genotype	clutch	treatment (vehicle = DMSO)	dose	hpf at exposure start	exposure duration (h)	heart rate (bpm) embryo 1	2	3	4	5	6	7	8	9	10	11	12	13	14	15	16	17	18	19	20	21	22	23	24	n embryos	mean.clutch	mean[treatment-vehicle]	percent change vs vehicle
2017-07-24	gper	uab 102	Mgper	C	E2	1μM	1	4	196	188	196	196	180	176	192	180	192	200															10	189.6	15.6	0.09
2017-07-24	gper	uab 102	Mgper	C	vehicle	0.001	1	4	180	176	176	184	172	164	176	172	168	172															10	174
2017-07-28	gper	uab 102	Mgper	A	E2	1μM	1	4	160	176	164	180	180	172	164	164																	8	170	25.2	0.17
2017-07-28	gper	uab 102	Mgper	A	vehicle	0.001	1	4	152	152	144	156	144	136	148	140	140	136															10	144.8
2017-07-28	gper	uab 102	Mgper	B	E2	1μM	1	4	192	212	216	200	200	208	188	216	196																9	203.11	21.78	0.12
2017-07-28	gper	uab 102	Mgper	B	vehicle	0.001	1	4	188	188	184	184	188	176	172	184	168																9	181.33
2017-07-28	gper	uab 102	Mgper	D	E2	1μM	1	4	200	192	188	192	200	180	176	192	192	176															10	188.8	9.2	0.05
2017-07-28	gper	uab 102	Mgper	D	vehicle	0.001	1	4	196	188	180	176	172	172	180	180	172	180															10	179.6
experiment date	gene	allele	genotype	clutch	treatment (vehicle = DMSO)	dose	hpf at exposure start	exposure duration (h)	heart rate (bpm) embryo 1	2	3	4	5	6	7	8	9	10	11	12	13	14	15	16	17	18	19	20	21	22	23	24	n embryos	mean.clutch	mean[treatment-vehicle]	percent change vs vehicle
2017-07-24	gper	uab 102	MZgper-/-	D	E2	1μM	1	4	152	140	148	140	132	132	128	136																	8	138.5	6.5	0.0492424
2017-07-24	gper	uab 102	MZgper-/-	D	vehicle	0.001	1	4	132	128	136	140	136	128	124																		7	132
2017-07-28	gper	uab 102	MZgper-/-	G	E2	1μM	1	4	176	180	200	188	184	184	176	184	176																9	183.111	-1.33333	-0.00722892
2017-07-28	gper	uab 102	MZgper-/-	G	vehicle	0.001	1	4	188	176	200	196	192	184	168	184	172																9	184.444
2017-08-03	gper	uab 103	MZgper-/-	H	E2	1μM	1	4	152	152	156	156	152	144	148	144	148	152	144	140													12	149	4.2	0.0290055
2017-08-03	gper	uab 104	MZgper-/-	H	vehicle	0.001	1	4	152	140	152	144	148	140	144	140	144	144															10	144.8
2017-08-03	gper	uab 105	MZgper-/-	I	E2	1μM	1	4	160	164	164	156	148																				5	158.4	4.4	0.0285714
2017-08-03	gper	uab 106	MZgper-/-	I	vehicle	0.001	1	4	156	156	152	156	156	148																			6	154

## Sheet: data for Fig S7
experiment date	embryo stage	allele	genotype	group	treatment	heart rate (bpm) embryo 1	2	3	4	5	6	7	8	9	10	11	12	13	14	15	16	17	18	19	20	21	22	23	24	n embryos	mean.group	mean[mutant-wildtype]	percent change vs wildtype
2017-06-28	51 hpf		wildtype	A	untreated	164	172	168	172	172	160	172	164	168																9	168
2017-06-28	51 hpf	uab 102	MZgper	A	untreated	144	148	148	140	140	140	140	144																	8	143	-25	-0.14881
2017-06-28	51 hpf	uab 102	Mgper	A	untreated	148	148	148	148	152	148	144	148	144																9	147.556	-20.4444	-0.121693
2017-06-28	51 hpf		wildtype	B	untreated	164	176	180	172	180	168	164	180																	8	173
2017-06-28	51 hpf	uab 102	MZgper	B	untreated	160	152	144	144	148	148																			6	149.333	-23.6667	-0.136802
2017-06-28	51 hpf	uab 102	Mgper	B	untreated	152	148	148	160	148	144	148																		7	149.714	-23.2857	-0.155931
2017-06-30	51 hpf		wildtype	C	untreated	164	164	160	164	164	168	160	156	164																9	162.667
2017-06-30	51 hpf	uab 102	MZgper	C	untreated	136	136	132	136	136	136	132	140	132																9	135.111	-27.5556	-0.169399
2017-06-30	51 hpf	uab 102	Mgper	C	untreated	140	140	128	136	136	140	136	140	140	132															10	136.8	-25.8667	-0.191447
2017-06-30	51 hpf		wildtype	D	untreated	160	160	156	160	164	164	160	168	156	164															10	161.2
2017-06-30	51 hpf	uab 102	MZgper	D	untreated	136	136	136	136	140	136	132	136																	8	136	-25.2	-0.156328
2017-06-30	51 hpf	uab 102	Mgper	D	untreated	128	132	136	132	136	132	136	136	124	136															10	132.8	-28.4	-0.208824
				embryos from same genotype but different group have different parents, mated separately
experiment date	embryo stage	allele	genotype	clutch	treatment (vehicle = DMSO)	dose	heart rate (bpm) embryo 1	2	3	4	5	6	7	8	9	10	11	12	13	14	15	16	17	18	19	20	21	22	23	24	n embryos	mean.clutch	mean[treatment-vehicle]	percent change vs vehicle
2017-07-03	50 hpf	uab 102	Mgper	E	G1	1μM	176	180	180	172	172	180																			6	176.667	37.8095	0.272291
2017-07-03	50 hpf	uab 102	Mgper	E	vehicle	0.001	152	136	140	136	132	136	140																		7	138.857
2017-07-03	50 hpf	uab 102	Mgper	F	G1	1μM	180	176	172	176	176	172	168	180																	8	175	25.5	0.170569
2017-07-03	50 hpf	uab 102	Mgper	F	vehicle	0.001	152	152	152	152	152	144	148	144																	8	149.5
2017-07-03	50 hpf	uab 102	Mgper	G	G1	1μM	172	168	168	168	168	168	168																		7	168.571	22.5714	0.154599
2017-07-03	50 hpf	uab 102	Mgper	G	vehicle	0.001	160	160	144	136	144	144	140	140																	8	146
